# Supplementary material
Source: MDPI journal article supplement (https://www.mdpi.com/2312-7481/9/3/67)
Supplement: s1 [file s1]

## Supporting information

### Fluorescent Magnetic Mesoporous Nanoprobes for Biotechnological Enhancement Procedures in Gene Therapy

Manuel A. González-Gómez <sup>\*,†</sup>, Román Seco-Gudiña <sup>†</sup>, Pelayo García-Acevedo, Ángela Arnosa-Prieto, Lisandra de Castro-Alves, Yolanda Piñeiro <sup>\*</sup> and José Rivas

NANOMAG Laboratory, Applied Physics Department, iMATUS Materials Institute, Universidade de Santiago de Compostela, 15782 Santiago de Compostela, Spain

<sup>\*</sup> Correspondence: manuelantonio.gonzalez@usc.es (M.A.G.G.); y.pineiro.redondo@usc.es (Y.P.); Tel.: +34-881813097 (M.A.G.G. and Y.P.)

<sup>†</sup> These authors contributed equally to this work.

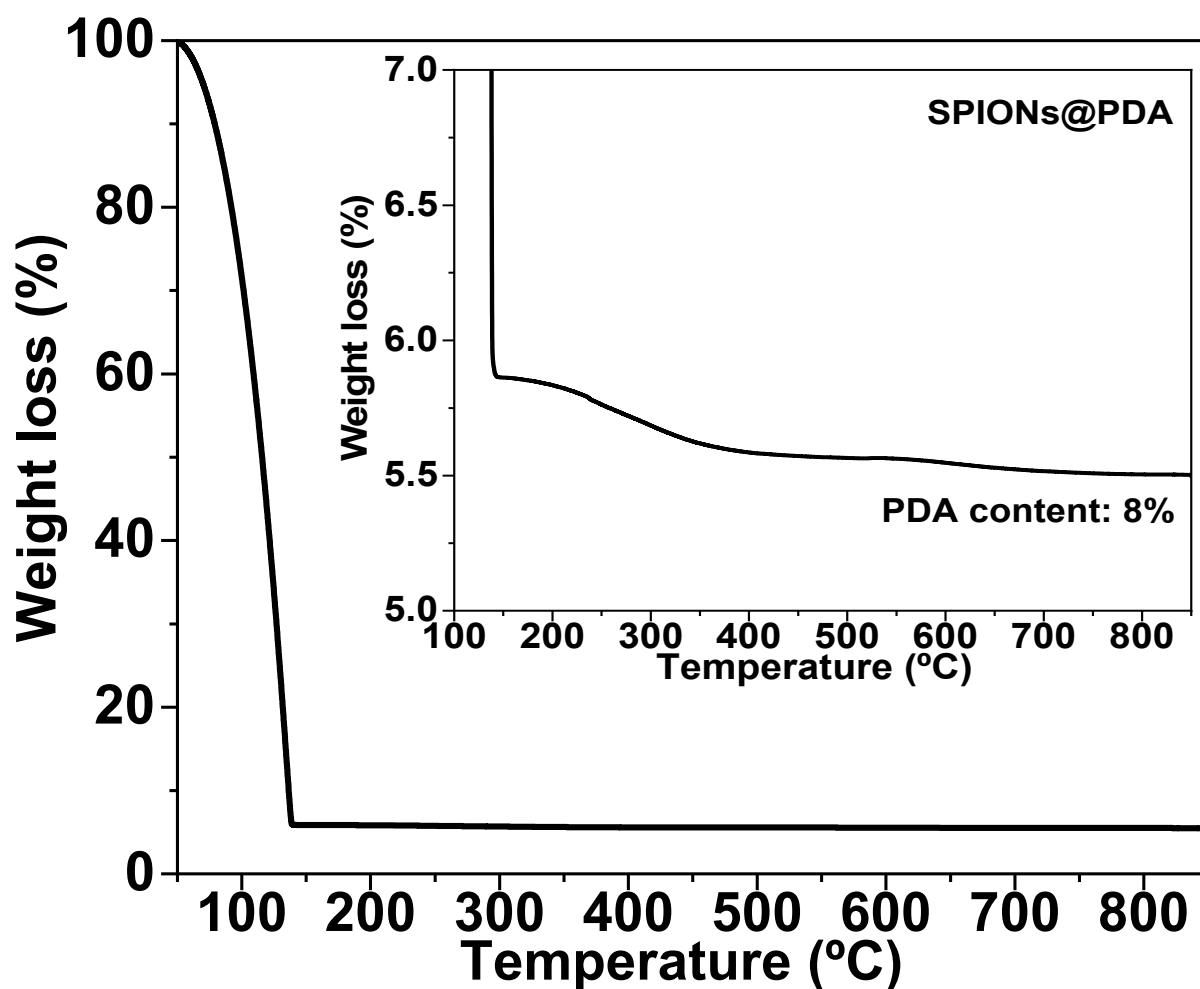

**Figure S1.** TGA thermogram of SPIONs@PDA. A two-stage thermal degradation process for PDA is observed in TGA curve of SPIONs@PDA. First weight loss stage (above 50°C) is related to the

evaporation of water molecules in the biopolymer matrix. The second weight loss occurs around 200 °C, which might correspond to the thermal oxidation and pyrolysis of the polymer. The residues remaining after pyrolysis are assumed to be the inorganic part of the nanostructures (Fe<sub>3</sub>O<sub>4</sub> nanoparticles).

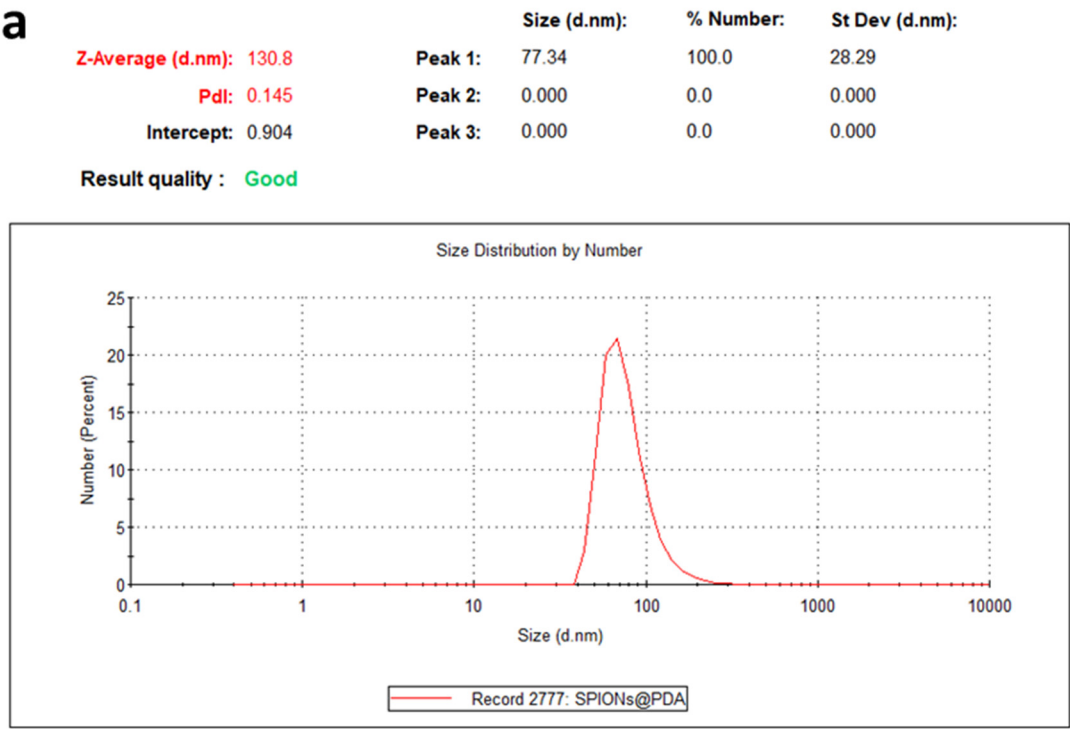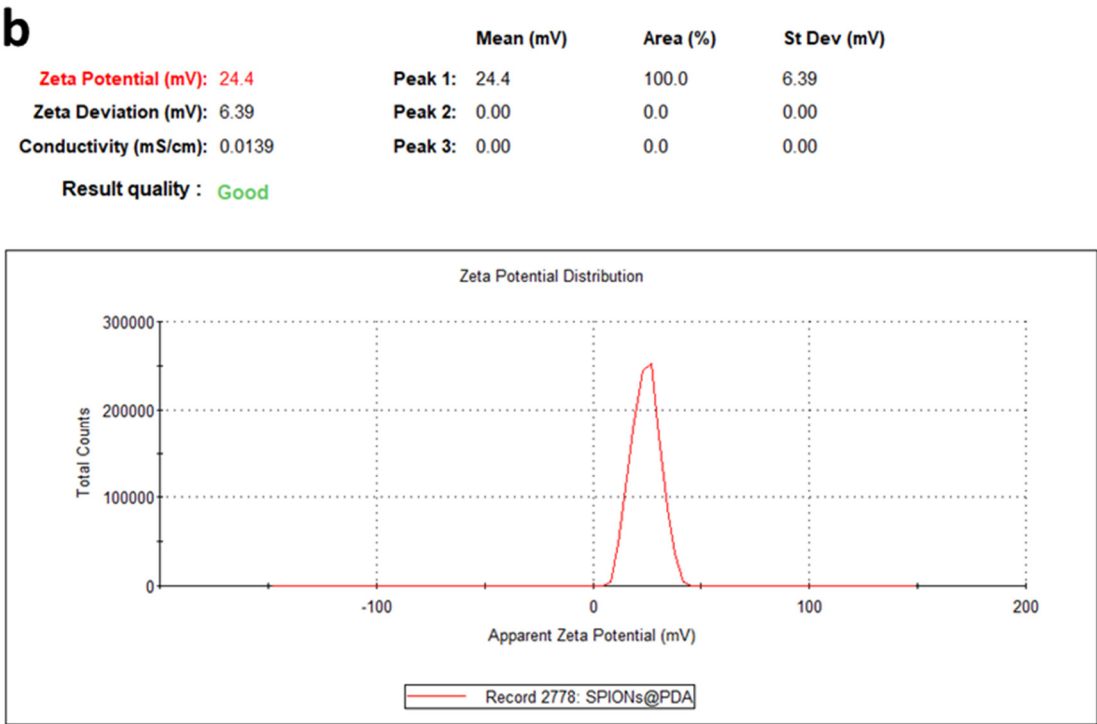

**Figure S2.** Dynamic Light Scattering measurements of SPIONs@PDA: Size Distributions by Number (a) and Zeta Potential Disributions (b).

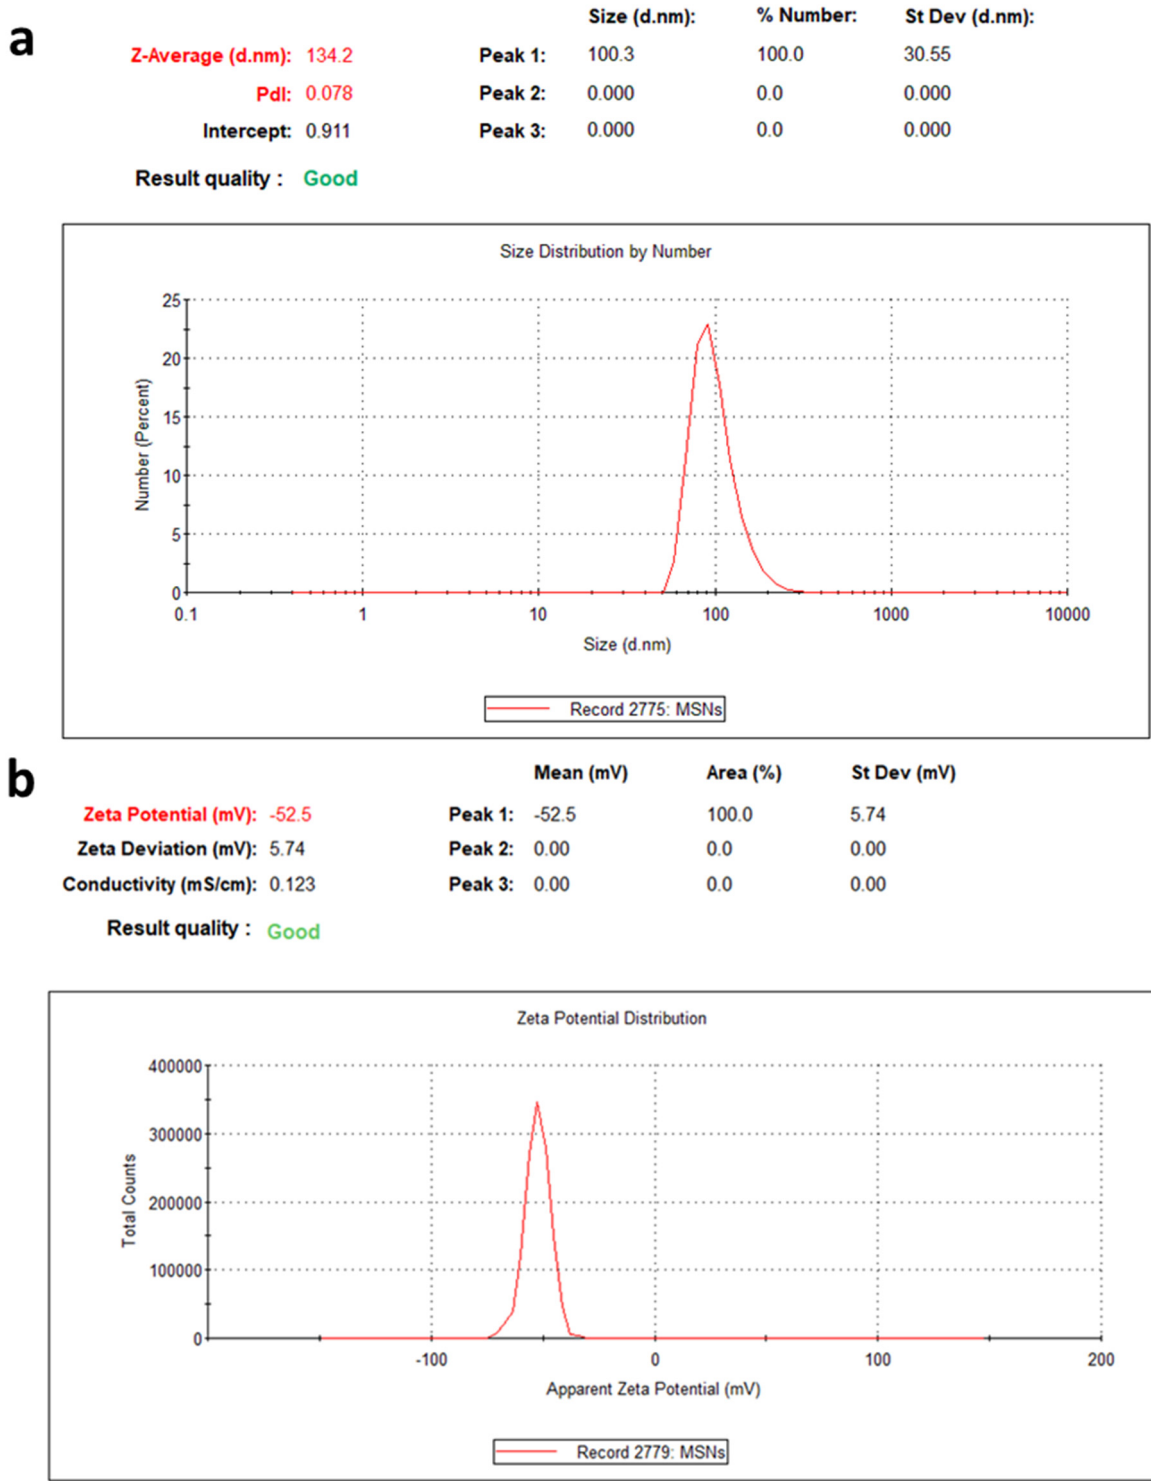

**Figure S3.** Dynamic Light Scattering measurements of MSNs: Size Distributions by Number (a) and Zeta Potential Disributions (b).



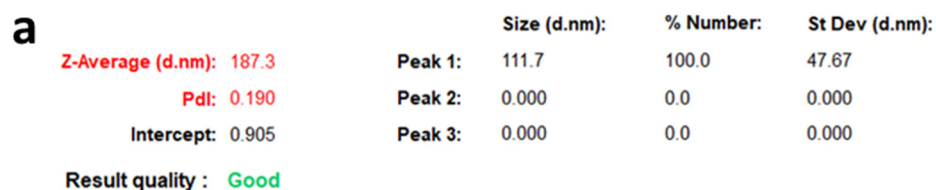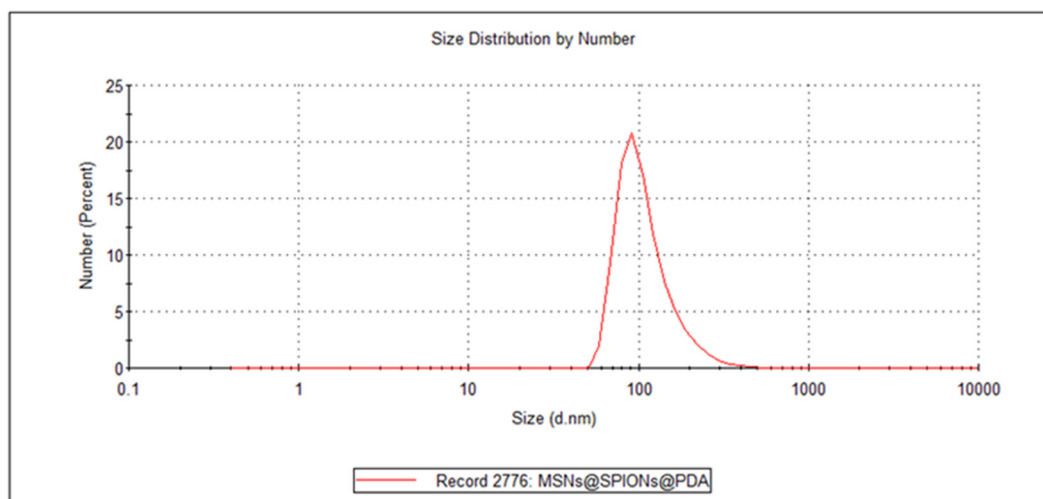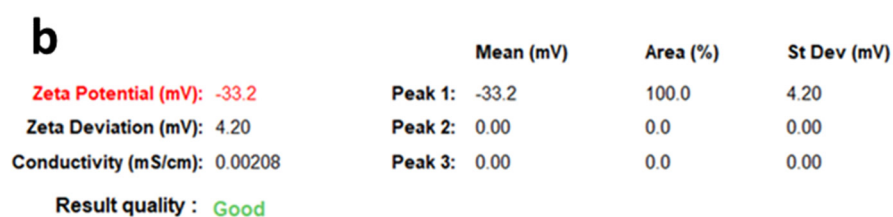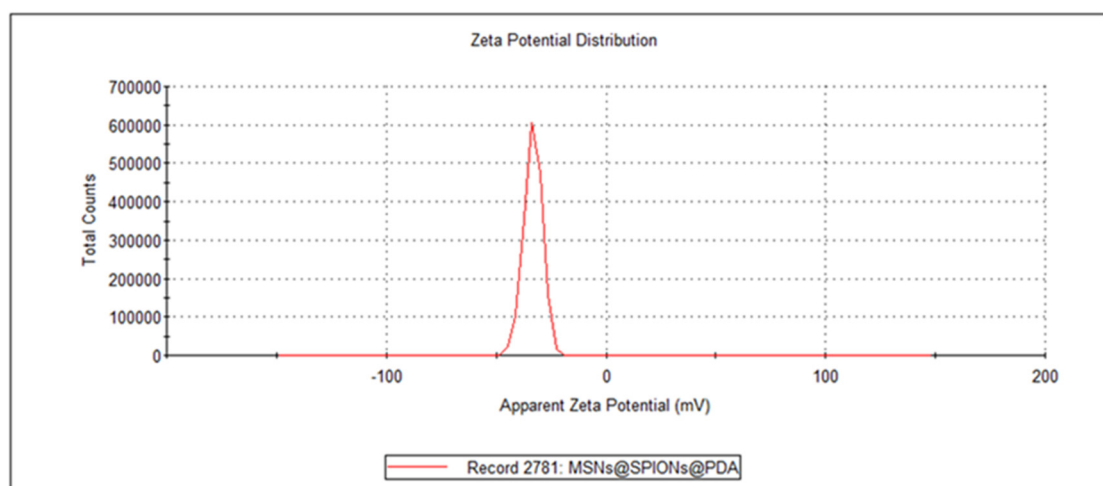

**Figure S4.** Dynamic Light Scattering measurements of MSNs@SPIONs@PDA: Size Distributions by Number (a) and Zeta Potential Disributions (b).

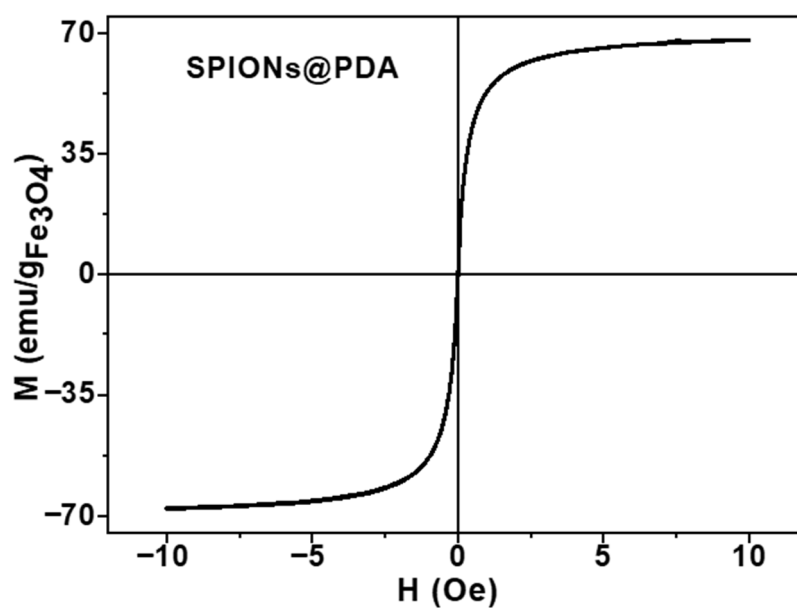

**Figure S5.** Hysteresis loops measured on SPIONs@PDA at room temperature.

At room temperature, SPIONs@PDA exhibited negligible coercive fields ( $H_c = 2.5$  Oe) and remanence ( $M_R = 0.4$   $\text{emu/gFe}_3\text{O}_4$ ), indicating a superparamagnetic behavior. Furthermore, the MNPs had a saturation magnetization of  $67.8$   $\text{emu/gFe}_3\text{O}_4$ .
